# Supplementary material for: A cross-sectional evaluation of five warfarin anticoagulation services in Uganda and South Africa
Source: PubMed Central journal article supplement (PMC6988943; doi:10.1371/journal.pone.0227458), 2020-01-29
Supplement: pone.0227458.s001.pdf [file pone.0227458.s001.pdf]

## APPENDIX: DATA COLLECTION FORM

Clinic Name \_\_\_\_\_

Date of Assessment \_\_ / \_\_ / \_\_

### Clinic Service Provision

Level of service provision

Primary

Secondary

Tertiary

Cadre of clinician providing care

Specialist

Nurse

Medical officer

Clinical officer

Information provided to patient

Counselling

Information sheets

Other \_\_\_\_\_

Number of clinics per week \_\_\_\_\_

Number of patients seen in past 4 weeks \_\_\_\_\_

Is point of care INR testing provided

Y

N

Average waiting time for INR results

Same day

1 day

2 days

Other \_\_\_\_\_

Is there a fee to attend clinic

Y

N

If Y, specify \_\_\_\_\_

Does the patient pay for INR testing

Y

N

If Y, specify \_\_\_\_\_

Describe the follow-up schedule: Weekly  Monthly  3-monthly  6-monthly  Other \_\_\_\_\_

What is the response to out of range INR?

Increase clinic frequency

Counselling

Dose adjustment

Other \_\_\_\_\_

How are defaulters managed? \_\_\_\_\_

## Drug prescribing and availability

What is the relationship with the pharmacy? On-site, part of clinic  On site, near the clinic   
Separate

Are standard guidelines for the initiation of warfarin available? Y  N  If Y, specify \_\_\_\_\_

What is the target INR range for patients with: AF \_\_\_\_\_ DVT \_\_\_\_\_ PE \_\_\_\_\_ Heart Valve Disorders \_\_\_\_\_

What is the standard warfarin loading regimen, and is this same for all indications of anticoagulation?

---

Do any individual patient factors alter the loading dose? Y  N   
If Y, which: Age  Weight  Comorbidities  Concomitant meds

Is warfarin dispensed to patients at the same facility? Y  N

Are the following alternatives available? Dabigatran  Rivaroxaban  Apixaban  Other \_\_\_\_\_

Do patients pay for medication? Y  N  If Y, specify \_\_\_\_\_

Is aspirin substituted or provided instead of warfarin? E.g for AF Y  N

Is heparin used for the initial treatment of PE/DVT? Y  N

## Guidance available for warfarin-dose adjustment

Is there an SOP/protocol/protocols for INR-guided dose adjustment of warfarin? Y  N

If Y, specify which \_\_\_\_\_ Is it referenced?  Is it validated for local population?

When dosing is adjusted what is the average frequency of subsequent INR checks? \_\_\_\_\_

In the event of a high INR how soon is an INR repeated? \_\_\_\_\_

Would vitamin K be administered to participants with an INR over 8? Y  N

**Folder and electronic record review**

Age \_\_\_\_ years                      Sex    M     F

Indication for anticoagulation    VHD     AF     DVT     PE     Other (specify) \_\_\_\_\_

INR target    2-3     2.5-3.5     3-4     Other (specify) \_\_\_\_\_

Comorbidities: TB     HIV     RHD     Others (specify) \_\_\_\_\_

Date of warfarin initiation    \_\_/\_\_/\_\_

Concomitant medication

| Drug  | Dose  | Date of initiation | Indication |
|-------|-------|--------------------|------------|
| _____ | _____ | __/__/__           | _____      |
| _____ | _____ | __/__/__           | _____      |
| _____ | _____ | __/__/__           | _____      |

Number of clinic visits over last 6 months    1     2     3     4     5     6     Other \_\_\_\_\_

INR results over last 6 months:

| INR   | Date     | INR   | Date     | INR   | Date     |
|-------|----------|-------|----------|-------|----------|
| _____ | __/__/__ | _____ | __/__/__ | _____ | __/__/__ |
| _____ | __/__/__ | _____ | __/__/__ | _____ | __/__/__ |
| _____ | __/__/__ | _____ | __/__/__ | _____ | __/__/__ |
